# Supplementary material for: A preliminary study of carbon dioxide and methane emissions from patchy tropical seagrass meadows in Thailand
Source: PeerJ. 2024 Oct 8;12:e18087. doi: 10.7717/peerj.18087 (PMC11468903; doi:10.7717/peerj.18087)
Supplement: Supplemental Information 1 — Each row represents the raw collected data of CO2, CH4, GPP, CR and NCP of two seagrass species and bare sand with its replicates. [file peerj-12-18087-s001.xlsx]

## Sheet: Data PeerJ
	Sampling point	Time code	Sampling Time	Replicate	Temp (°C)	CO2 emission (ppm)	CO2 emission (μmol CO2 m−2 h−1 )	CH4 emission (ppm)	CH4 emission (μg CH4 m−2 h−1 )	DO (mg/l)	Gross Primary Production (GPP)	Community Respiration (CR)	Net Community Production (NCP)
	Pathcy E. acoroides	t0	6.10pm	Chamber no. 1	32.291	61.6996	0.142478	43.9947	2.09357	7.55208	1.22399	-5.11649	6.34048
	Pathcy E. acoroides	t0	6.10pm	Chamber no. 2	32.291	61.2765	0.142449	NA (CH4 undetected)	NA (CH4 undetected)	5.09471
	Pathcy E. acoroides	t0	6.10pm	Chamber no. 3	32.291	61.5467	0.142463	NA (CH4 undetected)	NA (CH4 undetected)	7.45098
	Pathcy E. acoroides	t1	6.00am	Chamber no. 1	28.953	15.9408	0.144052	NA (CH4 undetected)	NA (CH4 undetected)	4.3871	2.00746	-1.5568	3.56426
	Pathcy E. acoroides	t1	6.00am	Chamber no. 2	28.953	15.5708	0.144101	NA (CH4 undetected)	NA (CH4 undetected)	4.1317
	Pathcy E. acoroides	t1	6.00am	Chamber no. 3	28.953	15.9322	0.144147	NA (CH4 undetected)	NA (CH4 undetected)	4.77728
	Pathcy E. acoroides	t2	1.00pm	Chamber no. 1	30.862	13.1783	0.143147	NA (CH4 undetected)	NA (CH4 undetected)	NA	NA	NA	NA
	Pathcy E. acoroides	t2	1.00pm	Chamber no. 2	30.862	13.2988	0.143143	NA (CH4 undetected)	NA (CH4 undetected)	NA	NA	NA	NA
	Pathcy E. acoroides	t2	1.00pm	Chamber no. 3	30.862	13.1084	0.143133	NA (CH4 undetected)	NA (CH4 undetected)	NA	NA	NA	NA
	Pathcy T. hemprichii	t0	6.25 pm	Chamber no. 1	32.394	42.9946	0.0485908	38.3879	1.35523	6.96774	1.49943	-4.1718	5.6713
	Pathcy T. hemprichii	t0	6.25 pm	Chamber no. 2	32.394	41.0346	0.0485738	NA (CH4 undetected)	NA (CH4 undetected)	5.54124
	Pathcy T. hemprichii	t0	6.25 pm	Chamber no. 3	32.394	42.7843	0.0485545	NA (CH4 undetected)	NA (CH4 undetected)	7.09677
	Pathcy T. hemprichii	t1	6.17 am	Chamber no. 1	28.853	20.9069	0.049163	NA (CH4 undetected)	NA (CH4 undetected)	4.3871	0.525861	-2.49152	3.01738
	Pathcy T. hemprichii	t1	6.17 am	Chamber no. 2	28.853	20.125	0.0491679	NA (CH4 undetected)	NA (CH4 undetected)	4.78655
	Pathcy T. hemprichii	t1	6.17 am	Chamber no. 3	28.853	20.8765	0.0491581	NA (CH4 undetected)	NA (CH4 undetected)	5.55556
	Pathcy T. hemprichii	t2	NA	Chambers were leakage	NA	NA	NA	NA	NA	NA	NA	NA	NA
	Pathcy T. hemprichii	t2	NA	Chambers were leakage	NA	NA	NA	NA	NA	NA	NA	NA	NA
	Pathcy T. hemprichii	t2	NA	Chambers were leakage	NA	NA	NA	NA	NA	NA	NA	NA	NA
	Bare sand area	t0	6.17 pm	Chamber no. 3	32.188	20.1534	0.00814027	NA (CH4 undetected)	NA (CH4 undetected)	6.49351	1.30382	-3.74588	5.04971
	Bare sand area	t0	6.17 pm	Chamber no. 2	32.188	20.1324	0.00806517	NA (CH4 undetected)	NA (CH4 undetected)	5.35948
	Bare sand area	t0	6.17 pm	Chamber no. 3	32.188	20.1465	0.00811604	NA (CH4 undetected)	NA (CH4 undetected)	5.44041
	Bare sand area	t1	6.07 am	Chamber no. 1	29.152	16.3822	0.00824649	NA (CH4 undetected)	NA (CH4 undetected)	2.83505	0.668209	-1.91977	2.58797
	Bare sand area	t1	NA	Chambers were leakage	NA	NA	NA	NA	NA	NA
	Bare sand area	t1	6.07 am	Chamber no. 3	29.152	15.002	0.00825383	NA (CH4 undetected)	NA (CH4 undetected)	6.86973
	Bare sand area	t2	12.15 am	Chamber no. 1	31.166	14.4279	0.00820553	NA (CH4 undetected)	NA (CH4 undetected)	NA	NA	NA	NA
	Bare sand area	t2	12.15 am	Chambers were leakage	NA	NA	NA	NA	NA	NA	NA	NA	NA
	Bare sand area	t2	12.15 am	Chambers were leakage	NA	NA	NA	NA	NA	NA	NA	NA	NA
